# Supplementary material
Source: MDPI journal article supplement (https://www.mdpi.com/2673-4591/10/1/44)
Supplement: s1 [file s1]

---

# Data-centric Performance Improvement Strategies for Few-shot Classification of Chemical Sensor Data

---

Bhargavi Mahesh, Teresa Scholz, Jana Streit, Thorsten Graunke, Sebastian Hettenkofer  
8th International Electronic Conference on Sensors and Applications

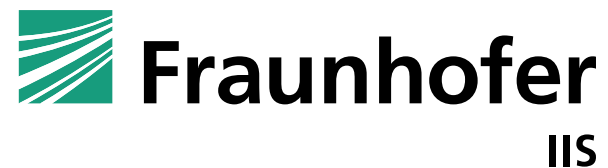

---

# Outline

---

- Motivation/Introduction
- Related work
- Data description
- Few-shot classification: Methodology and illustration
- Few-shot classification: Application and results
- Classification analyses
  - Sample screening
  - Error analysis
- Data analysis
- Data-centric performance improvement strategies
- Conclusions

# Overview

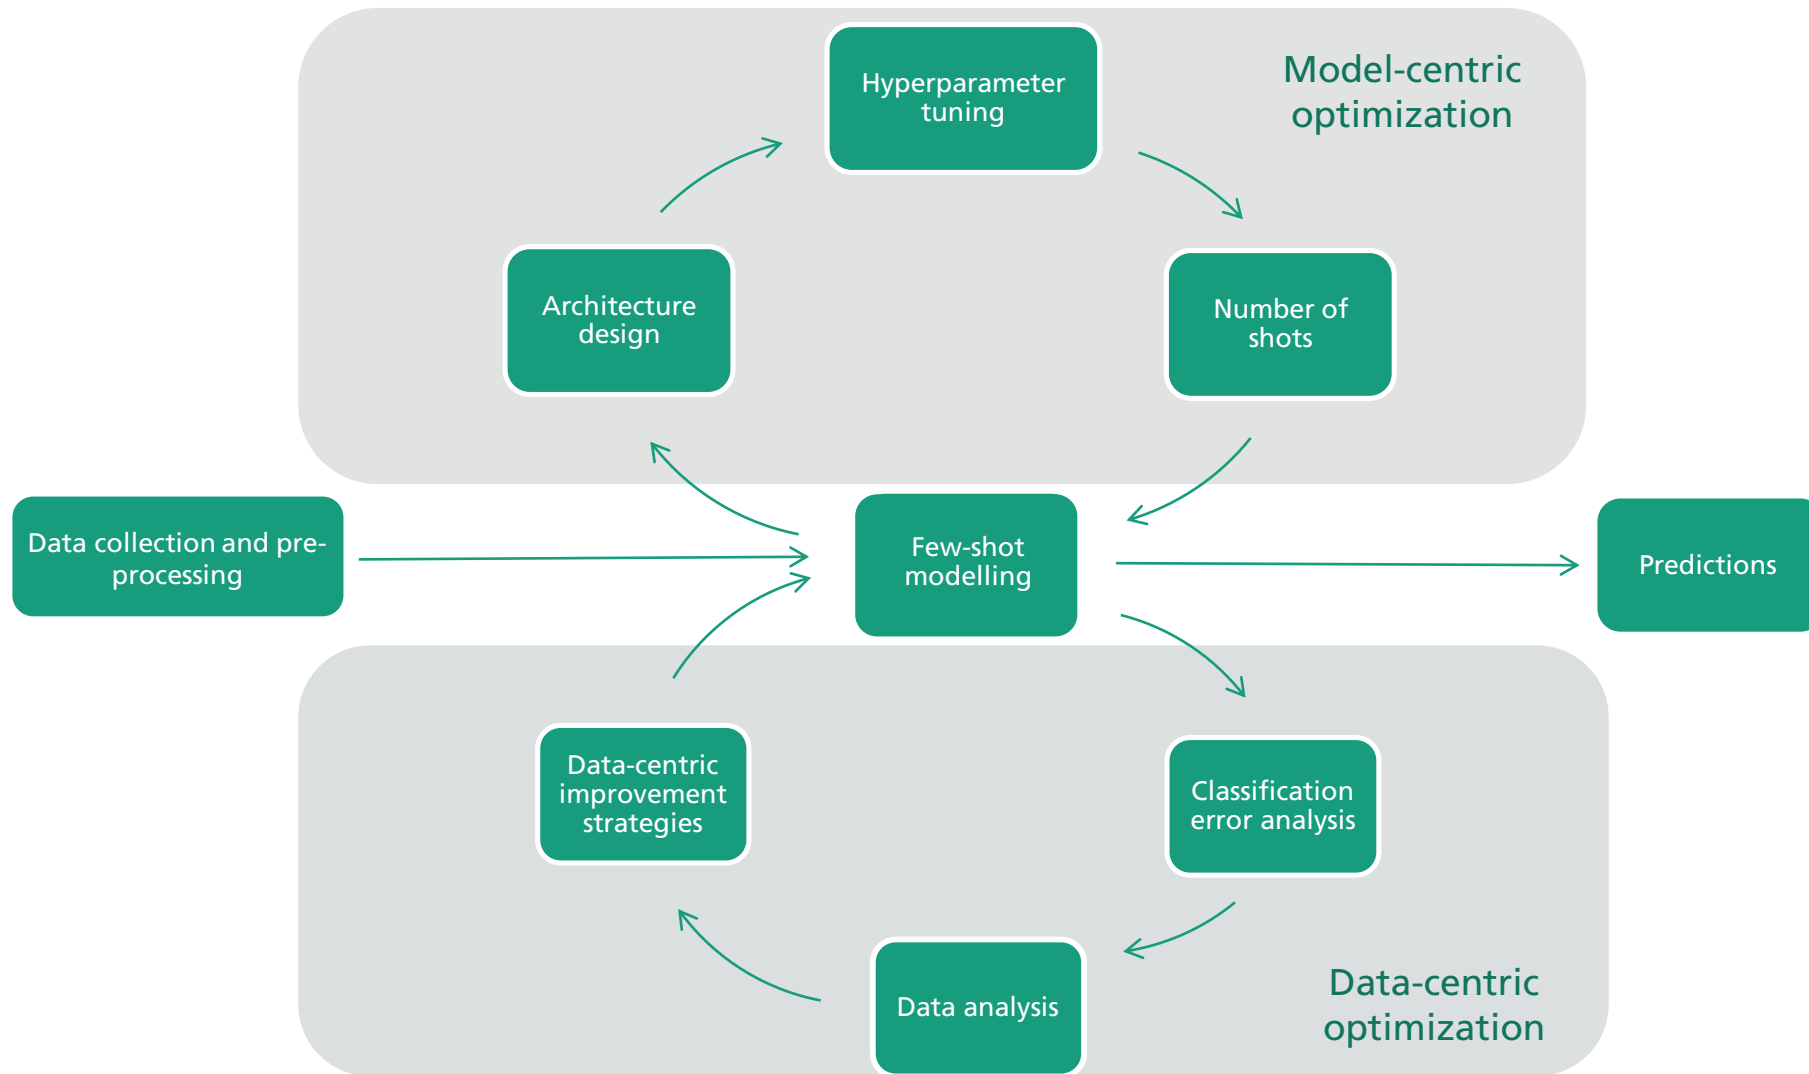

---

# Motivation

---

- MOX sensors are an inexpensive alternative to classic methods (GS, MS, FTIR) for gas detection and classification.
- Specific layers and temperature modulation to increase selectivity to target volatile compounds.
- Problem: Temperature modulation yields long data collection process and hinders real-time inferencing.
- Solution: Rapid classification strategy, such as few-shot classification.

---

# Methodology and state of the art

---

- Data collected using MOX sensors serve as a "fingerprint" of the volatile components emitted by the measured substance.
- Detect any deviation of the norm using pattern recognition algorithms!
- Application in food industry<sup>1,2</sup>:
  - Food authenticity: adulterated milk, cow ghee, olive oil, saffron, cherry tomato juice
  - Geographical origin: olive oil, orange juice, meat, milk or honey
  - Food spoilage: microbial contamination in soft drinks and juices
  - Freshness: meat, eggs or fish
  - Ripeness: fruit and wines

1 Gliszczynska-Swigło, A.; Chmielewski, J. Electronic Nose as a Tool for Monitoring the Authenticity of Food. A Review. *Food Analytical Methods* 2017, 10.

2 Berna, A. Metal Oxide Sensors for Electronic Noses and Their Application to Food Analysis. *Sensors* 2010, 10, 3882–3910.

# Dataset Description

- Volatile organic compounds (VOCs) in fruit juices/odors
  - Juices: Apple, Orange, Blackcurrant, and Multivitamin
  - Target VOCs: esters, aldehydes, ketones, alcohols, hydrocarbons [1]
- Eight AS-MLV-P2 MOX sensors
  - Four exposed to juice headspace and air (phases)
  - Four exposed to air
- Phase duration = 10 minutes
- Temperature cycle of 12 seconds (10 samples per second)
- Measurement of interest: Sensor voltage over time
- Collected over 4 non-consecutive days

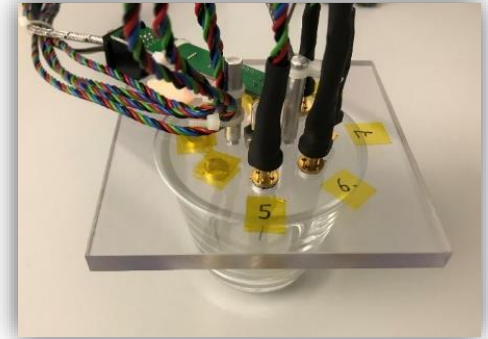

Fig 1: Data collection setup

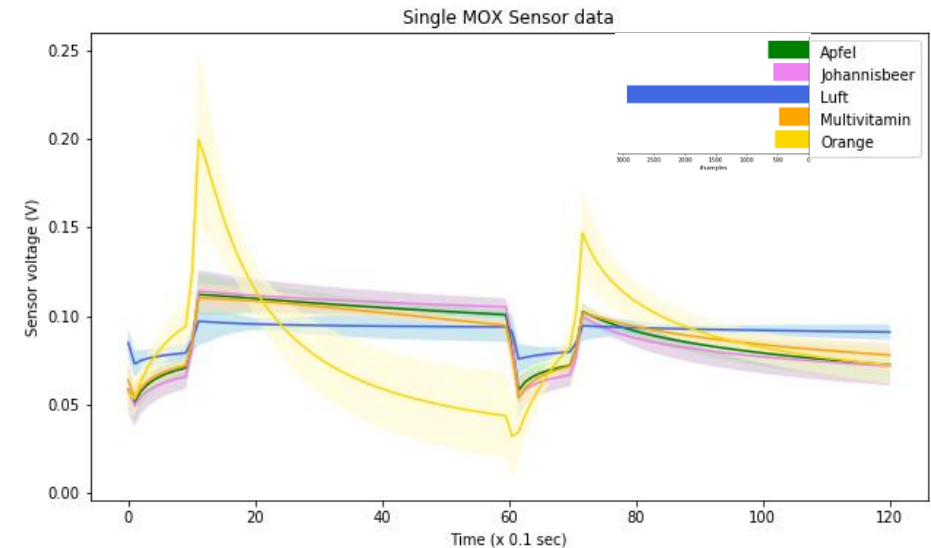

Fig 2: Normalized data from a single MOX sensor

# Method: Few-shot Classification

## Meta-training stage

- Input: Base classes, i.e. samples not containing novel class
- Prediction: 4 (base) classes
- Learn  $f_{\theta}$  and  $C(\cdot|w)$
- 200 epochs with learning rate 0.01

## Meta-testing/ Fine-tuning stage

- Input: Base class samples + 5, 25, 40, 75 shots of novel juice
- Prediction: 5 classes (4 base classes + novel class)
- Freeze  $f_{\theta}$
- Fine-tune  $C(\cdot|w)$
- 200 epochs with learning rate 0.001

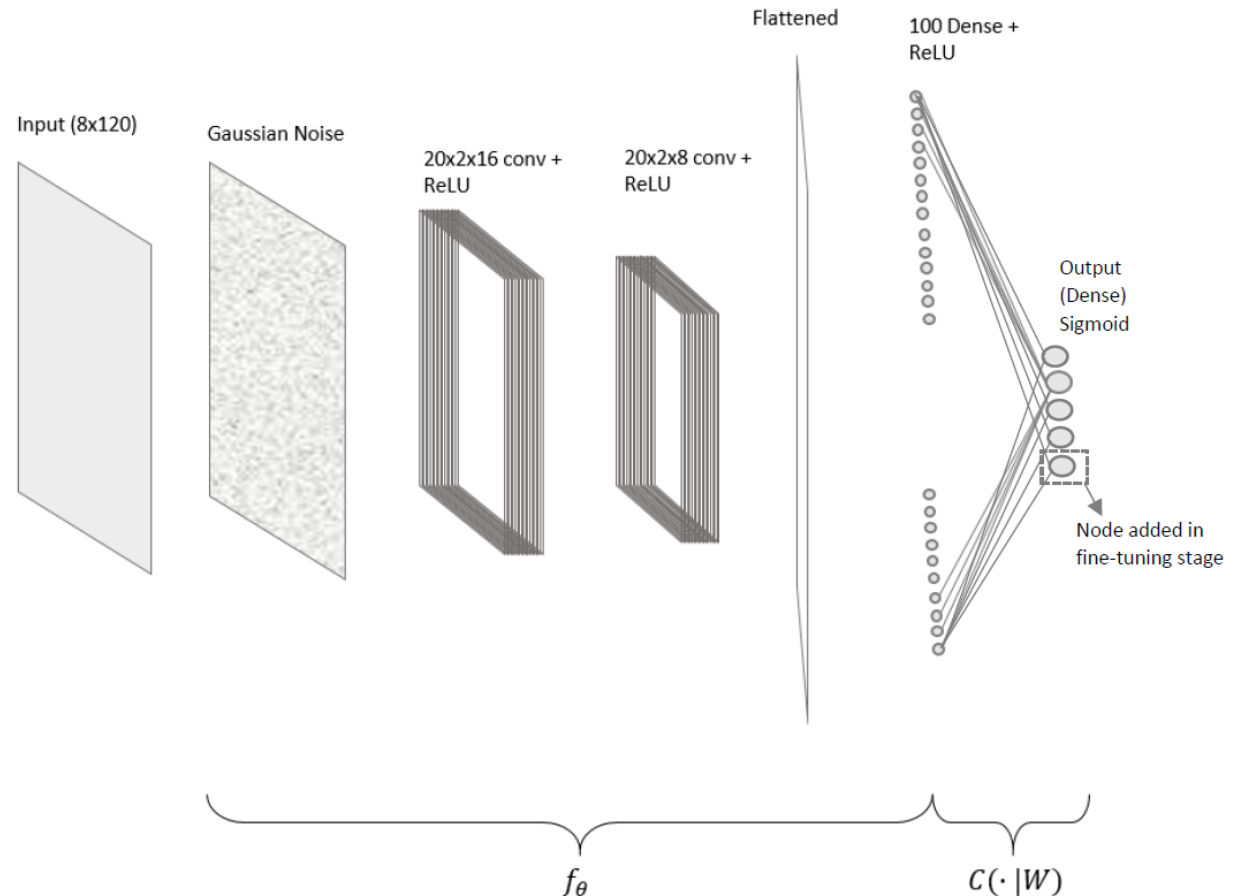

Fig 3. Architecture of the CNN used for multiclass classification.

# Illustration: Few-shot Classification

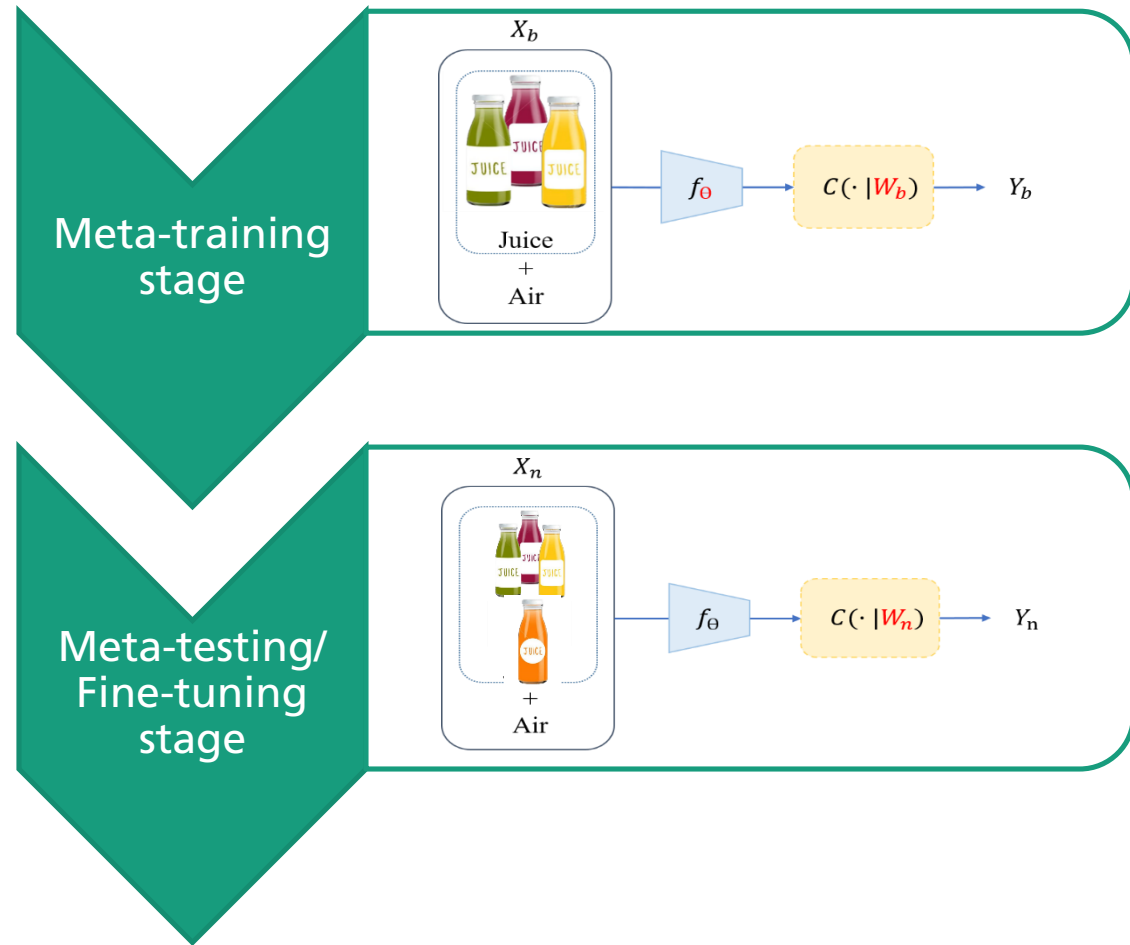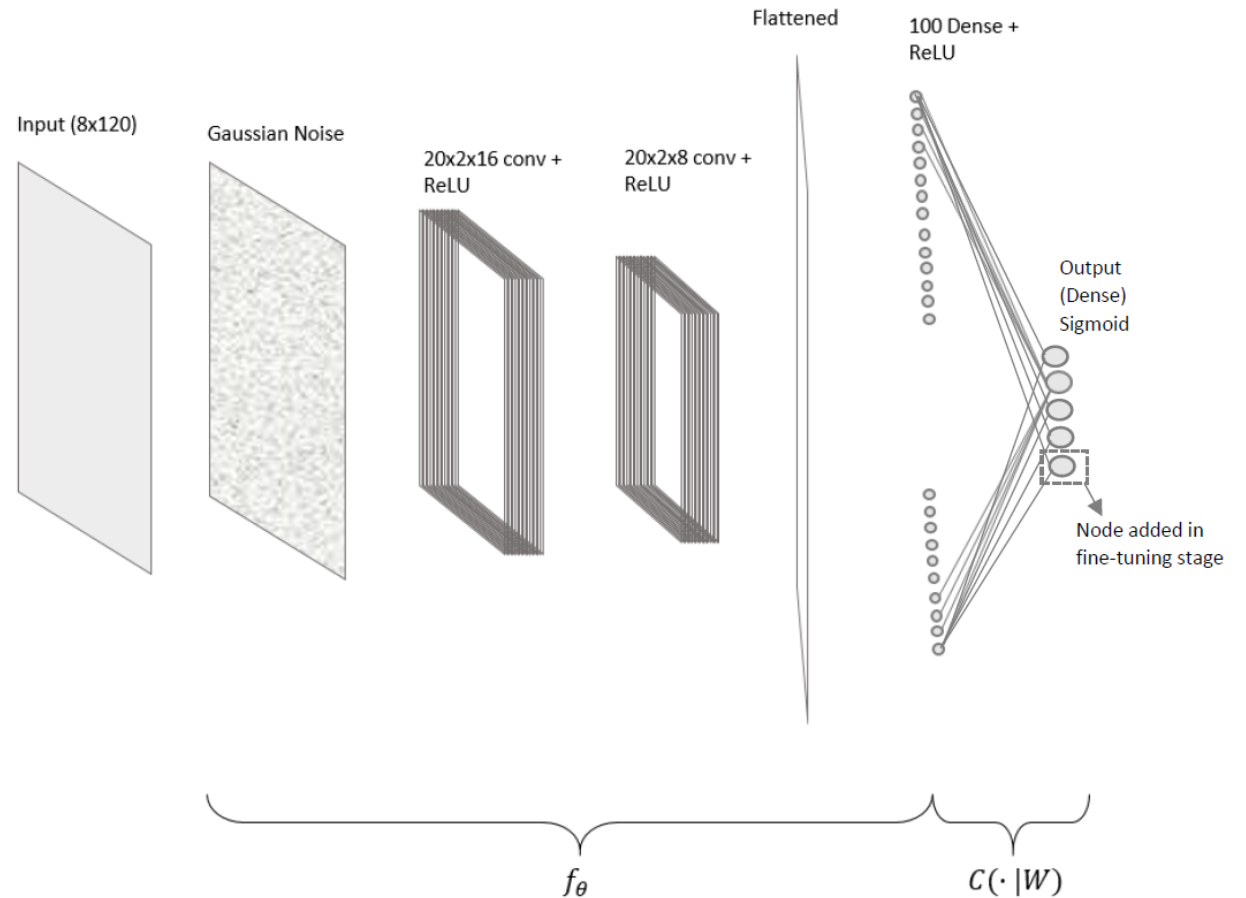

Fig 3. Architecture of the CNN used for multiclass classification.



---

# Experiments

---

- Four experiments with each of the four juices in new juice class,  $X_n$ 
  - One experiment = Meta-training stage + Meta-testing (fine-tuning) stage
  - Both stages have training and validation/test data
  - Classification accuracy as metric.
- Test post meta-training
  - Zero-shot test – How different is the new juice odor from base juices?
- Tests post fine-tuning
  - 1-shot/ 25-shot/ 50-shot/ 75-shot test – To what extent **1, 25, 50, 75 inputs** of new juice odor contributes to learning of the new odor?
  - Catastrophic forgetting tests – How well can the model remember the base classes after fine-tuning?

---

# Baseline Few-Shot Classification (E0) Results

---

| Validation | #shots  | Test   | CFT    |
|------------|---------|--------|--------|
| 0.82825    | 0-shot  | 0.4618 | -      |
|            | 5-shot  | 0.4446 | 0.8143 |
|            | 25-shot | 0.6934 | 0.8118 |
|            | 50-shot | 0.7742 | 0.8109 |
|            | 75-shot | 0.8247 | 0.7907 |

Tab 1: Average validation, test and catastrophic forgetting test accuracies

# Sample Screening

- Design: Each phase = 1 juice measured for ~10 minutes.
- Observation: Not all measurements in a phase are representative of the juice class.
- Hypothesis: Contamination affected initial measurements of each phase.

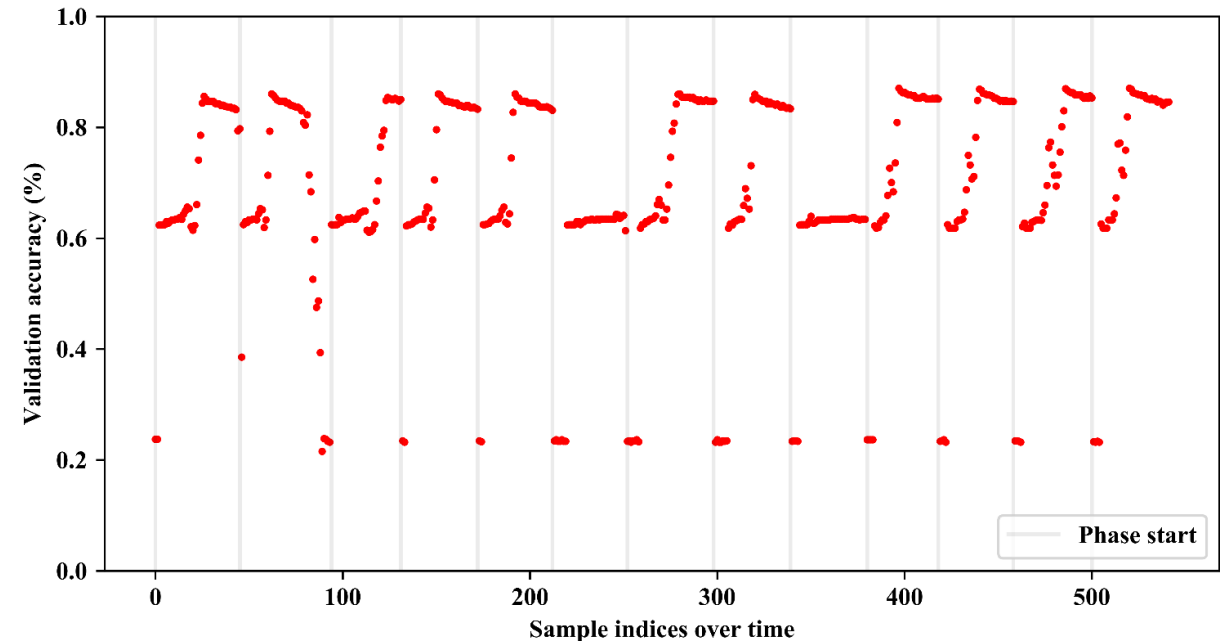

Fig 4. Test accuracies obtained when the classifier is finetuned on every sample of Orange juice. Samples from the beginning of the phase often resulted in reduced performance

# Error Analysis

- Observations:
    - Misclassifications for juice decrease as shots increase.
    - More than 60% of air misclassifications are related to the previous juice class
- => Another indication of contamination

|         | Class | #M   | #I  | % M   | % I   |
|---------|-------|------|-----|-------|-------|
| 5-shot  | Air   | 357  | 243 | 11.09 | 68.07 |
|         | Juice | 3220 | 460 | 100.0 | 14.29 |
| 25-shot | Air   | 474  | 336 | 14.72 | 70.89 |
|         | Juice | 1501 | 233 | 46.61 | 15.52 |
| 50-shot | Air   | 443  | 267 | 13.76 | 60.27 |
|         | Juice | 1011 | 86  | 31.40 | 8.51  |
| 75-shot | Air   | 340  | 269 | 10.56 | 79.12 |
|         | Juice | 789  | 22  | 24.50 | 2.79  |

Tab 2: Misclassification (M) out of 3220 per class and previous phases' influences (I) on the misclassifications.

# Data Analysis - Class Separability and Contamination

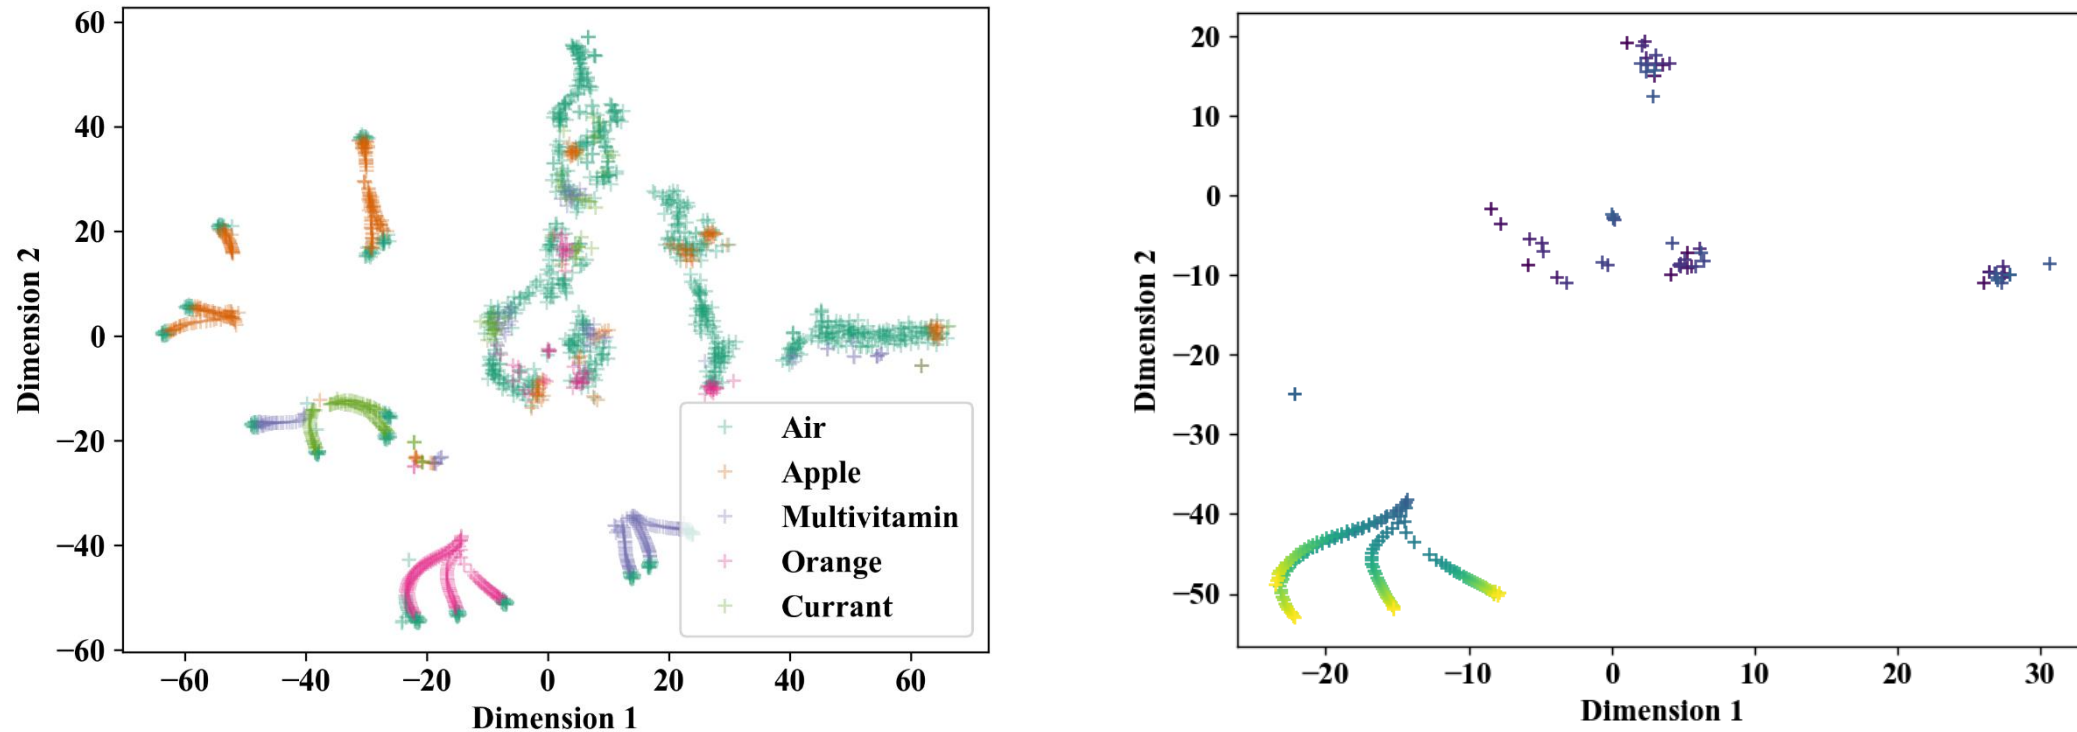

Fig 5: All (left) and just orange juice (right) measurements projected into t-SNE plane.

Contamination through previously measured substance visible in the t-SNE plot.

# Data Analysis - Class Separability and Contamination

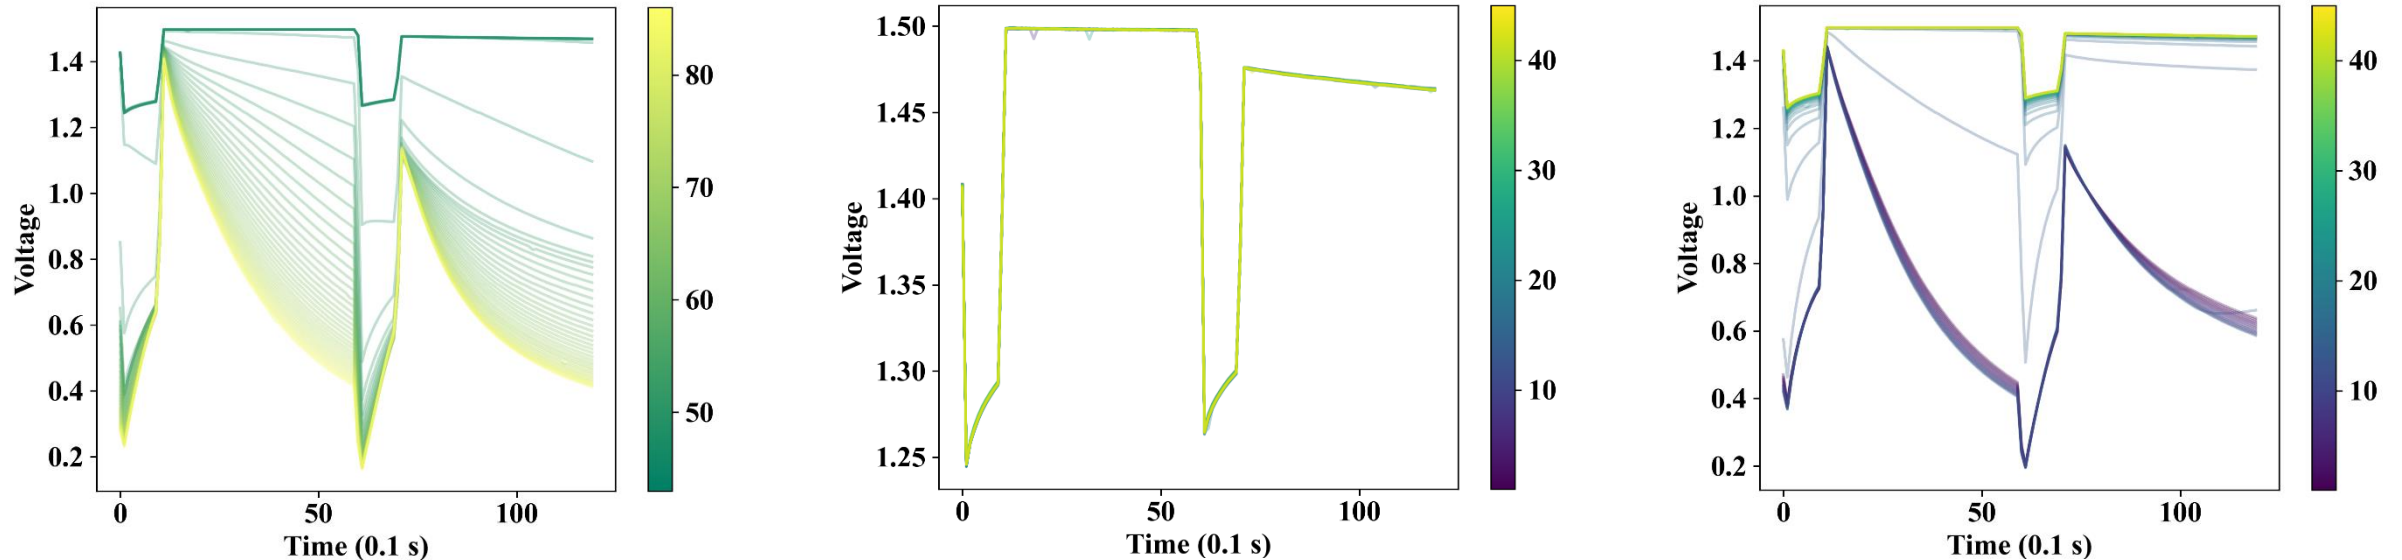

Fig 6: Measurements collected during a phase of orange juice measurements following a phase of air measurement (left), air measurements following a phase of orange juice measurement (right) and reference measurements of the room air collected at the same time (middle).

- Deviation from „air“ signal to „orange“ signal over measurement phase (left).
- Contamination of „air“ signal through previously measured orange juice (right).

# Data-centric Performance Improvement Strategies

- Baseline and three data-centric improvement strategies:
  - E0: Baseline
  - E1: Dropping first and last 10 samples for fine-tuning
  - E2: Dropping first half of phase for fine-tuning
  - E3: Dropping first half of phase and retraining
- Results:
  - Baseline (E0): No significant dropping of samples
  - E1 performed the best in terms of average validation accuracy for 75 shots, E2 for 25 and 50 shots, and E3 for 5 shots.
  - E1 had least influence on air misclassification and E3 the least juice misclassification.

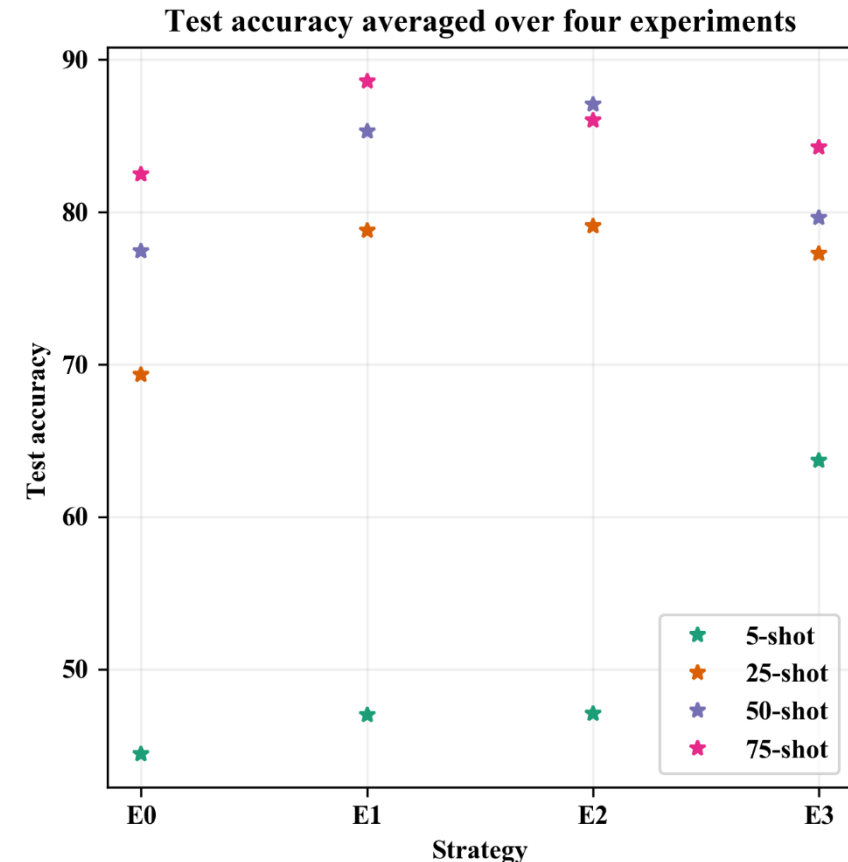

Fig 7. Test accuracies averaged over shots for four strategies

---

# Conclusion

---

- Demonstrated the impact of data quality on prediction performance.
- Showed different data-centric performance improvement strategies
  - Classification improvement seen through strategy E1 and E2 – removal of 10 samples from the beginning and end of the phases and removal of initial half phase, respectively, before fine-tuning.
  - E1 had least influence on air misclassification and E3 the least juice misclassification.
- Susceptibility to contamination of MOX sensor data hinders rapid learning.
- Feasible for binary classification with distinct classes, e.g., Air vs. Juice.
